# Supplementary material for: Revealing Edible Bird Nest as Novel Functional Foods in Combating Metabolic Syndrome: Comprehensive In Silico, In Vitro, and In Vivo Studies
Source: MDPI journal article supplement (doi:10.3390/nu15183886), 2023-09-06

## The BPI Plot of Sampel

Item name: 230526\_Biotin 1 ppm\_Pos

Channel name: 1: TOF MS<sup>E</sup> BPI (50-1200) 6eV ESI+ : Integrated : Smoothed

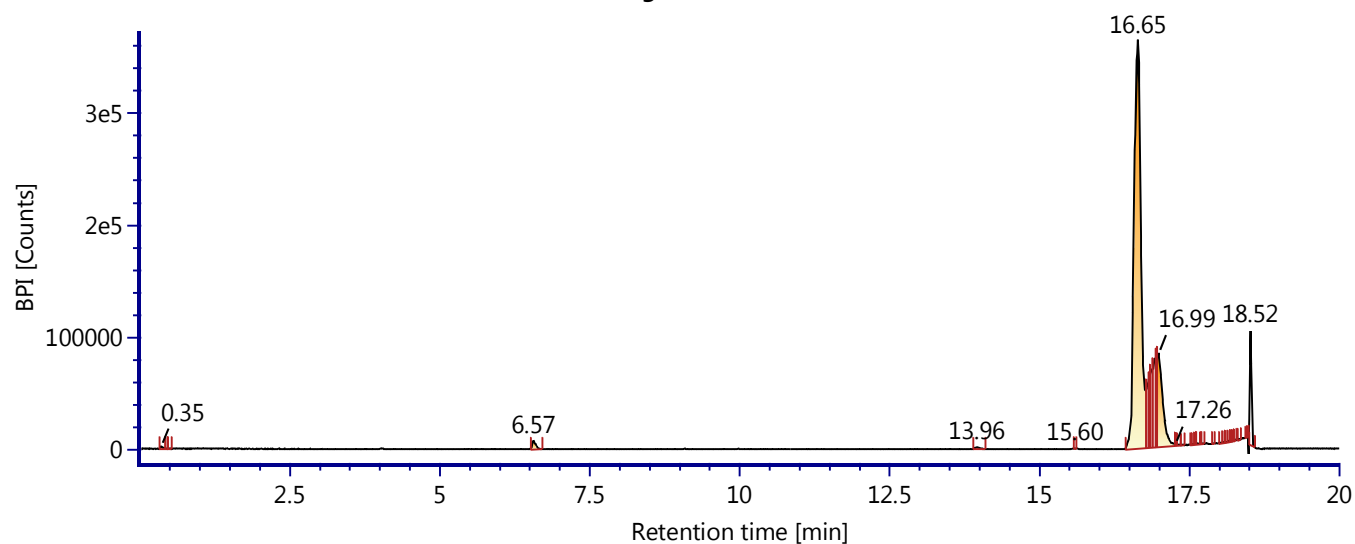

## Component Plot

Item name: 230526\_Biotin 1 ppm\_Pos

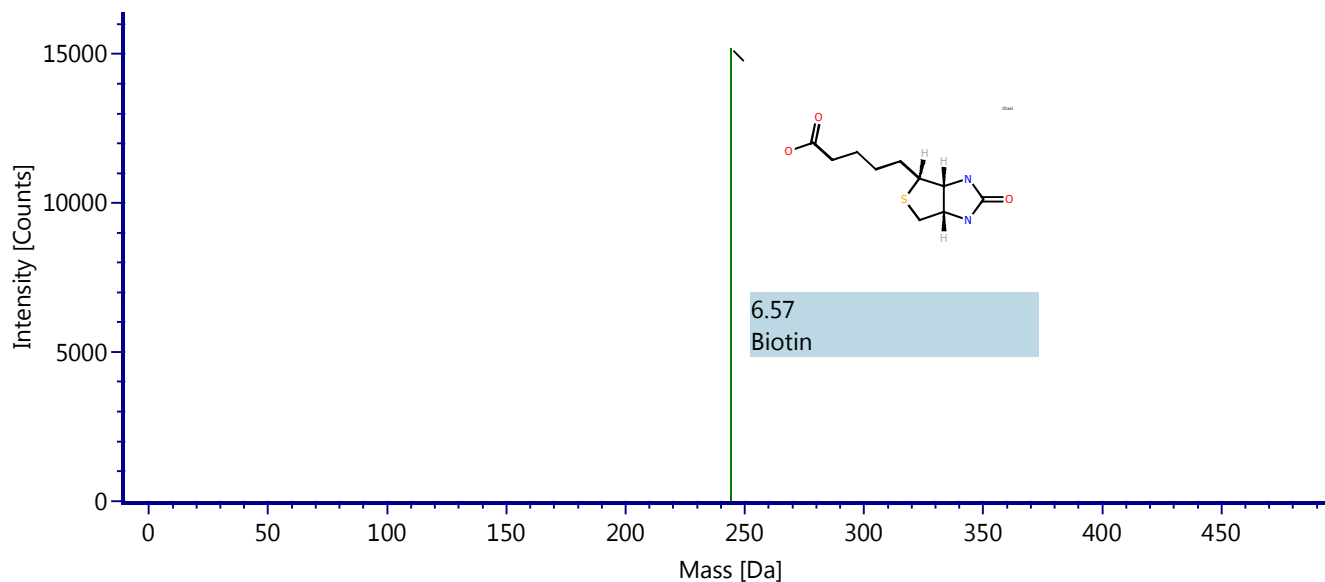

## Component Summary (Confirmed)

Confirmed Component

| Component name | Formula                                                         | Identification status | Observed RT (min) | Mass error (ppm) | Total Fragments Found | Isotope Match Mz RMS PPM | Isotope Match Intensity RMS Percent | Response | Adducts |
|----------------|-----------------------------------------------------------------|-----------------------|-------------------|------------------|-----------------------|--------------------------|-------------------------------------|----------|---------|
| Biotin         | C <sub>10</sub> H <sub>16</sub> N <sub>2</sub> O <sub>3</sub> S | Identified            | 6.57              | -0.4             | 11                    | 1.42                     | 0.63                                | 15180    | +H      |

Item name: 230526\_Biotin 1 ppm\_Pos

Channel name: Biotin [+H] : (33.3 PPM) 245.0954

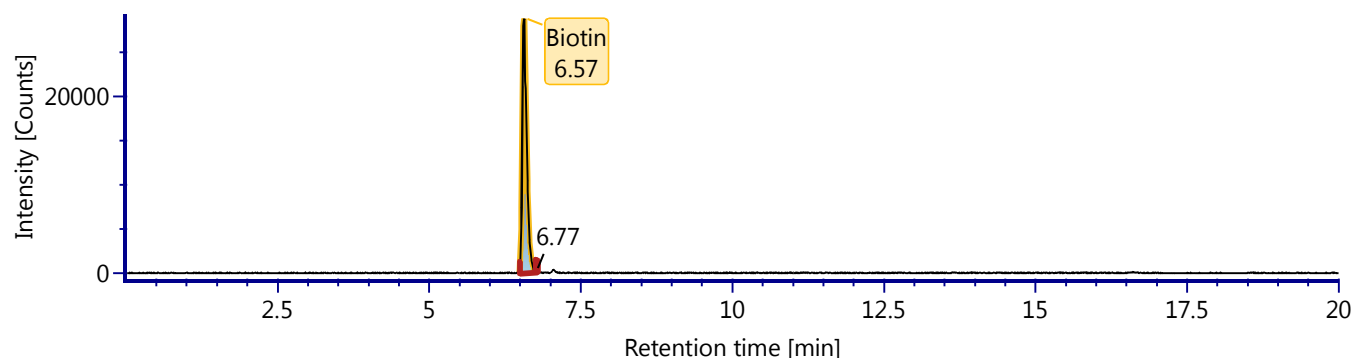

Item name: 230526\_Biotin 1 ppm\_Pos

Component name: Biotin

Item description:

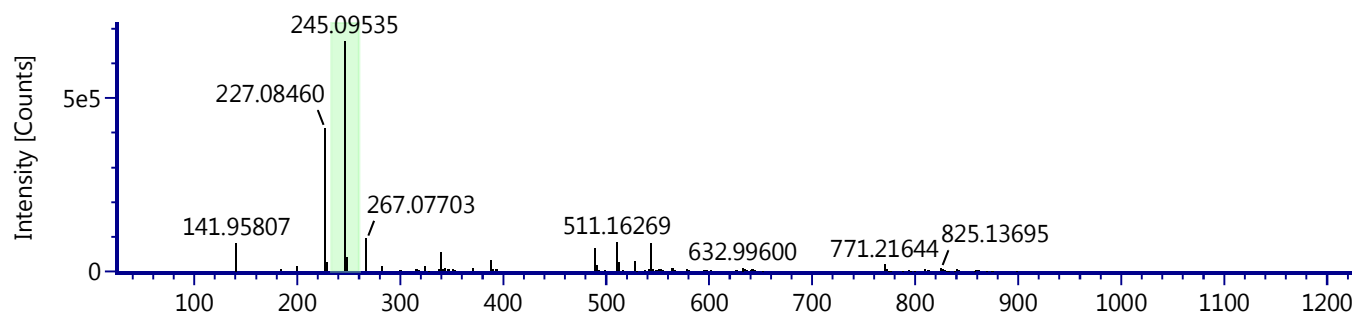

Item name: 230526\_Biotin 1 ppm\_Pos

Component name: Biotin

Item description:

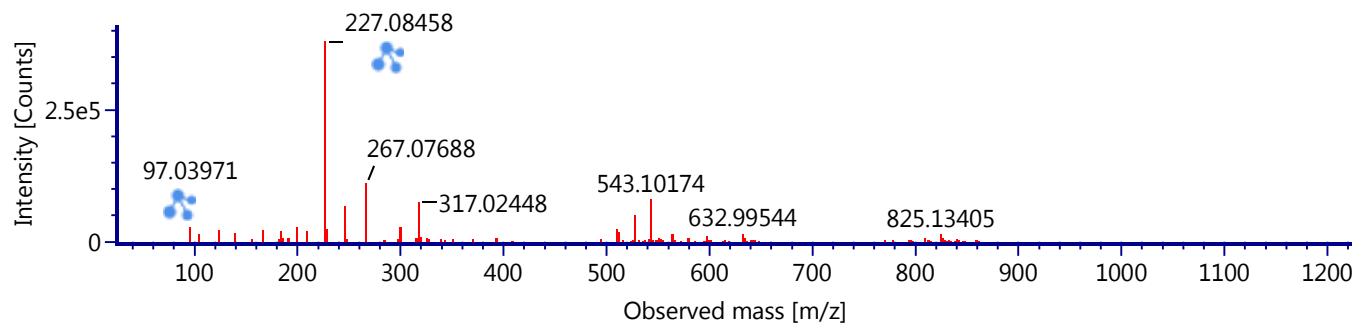

## The BPI Plot of Sampel

Item name: 230526\_MeOH\_1\_Pos

Channel name: 1: TOF MS<sup>E</sup> BPI (50-1200) 6eV ESI+ : Integrated : Smoothed

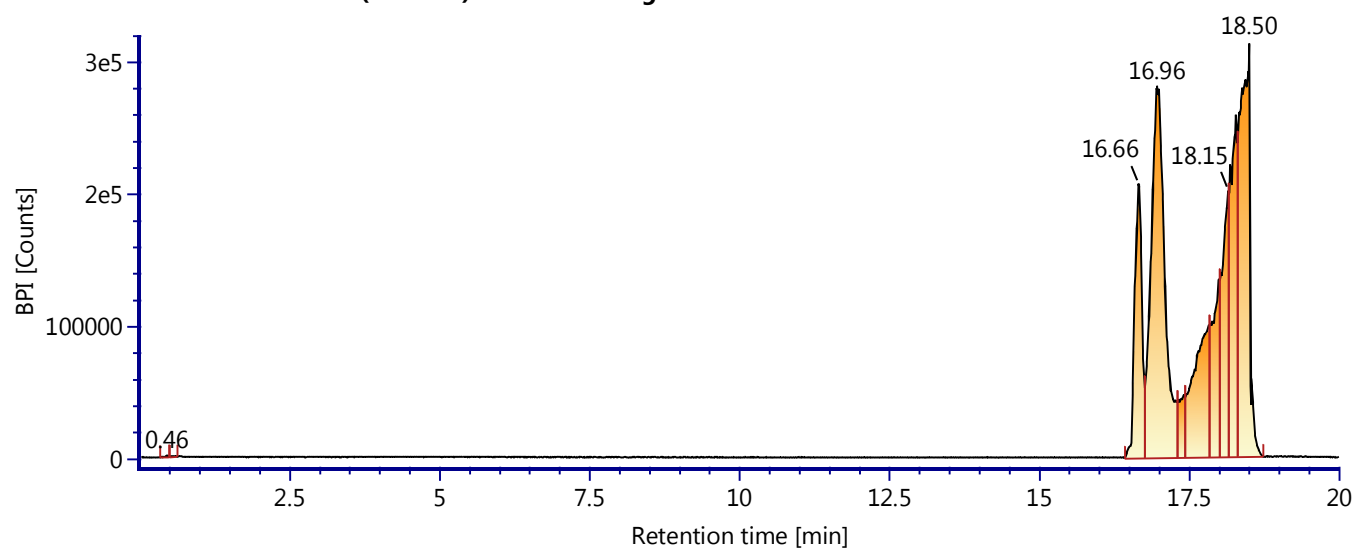

## The BPI Plot of Sampel

Item name: 230526\_305 R 93\_1\_Pos

Channel name: 1: TOF MS<sup>E</sup> BPI (50-1200) 6eV ESI+ : Integrated : Smoothed

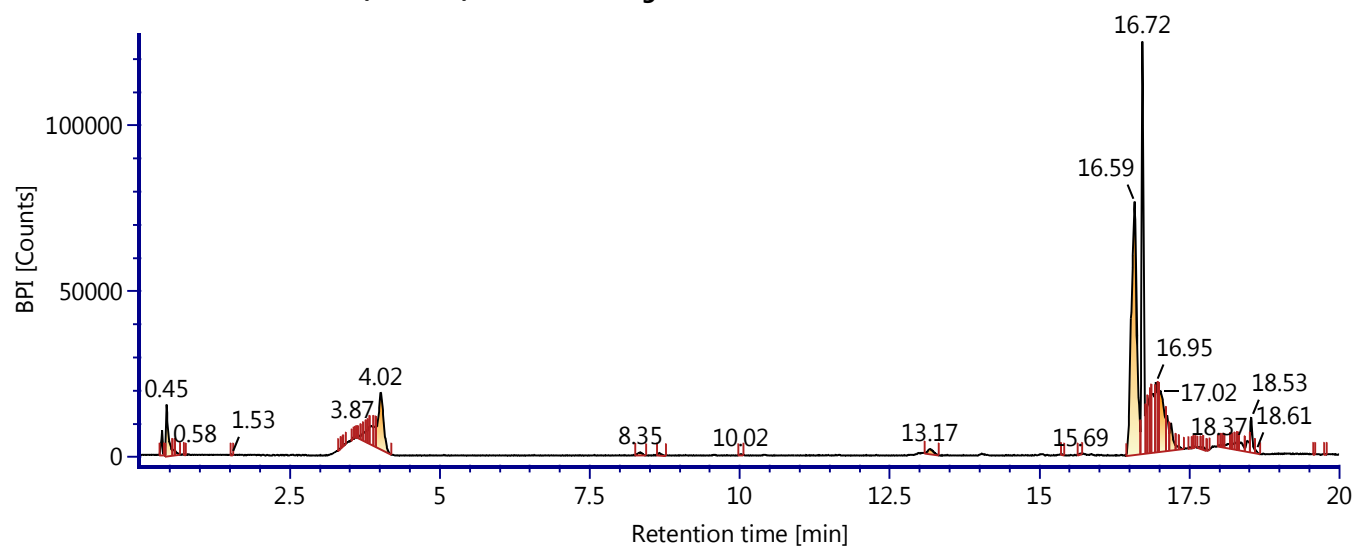

## Component Plot

Item name: 230526\_305 R 93\_1\_Pos

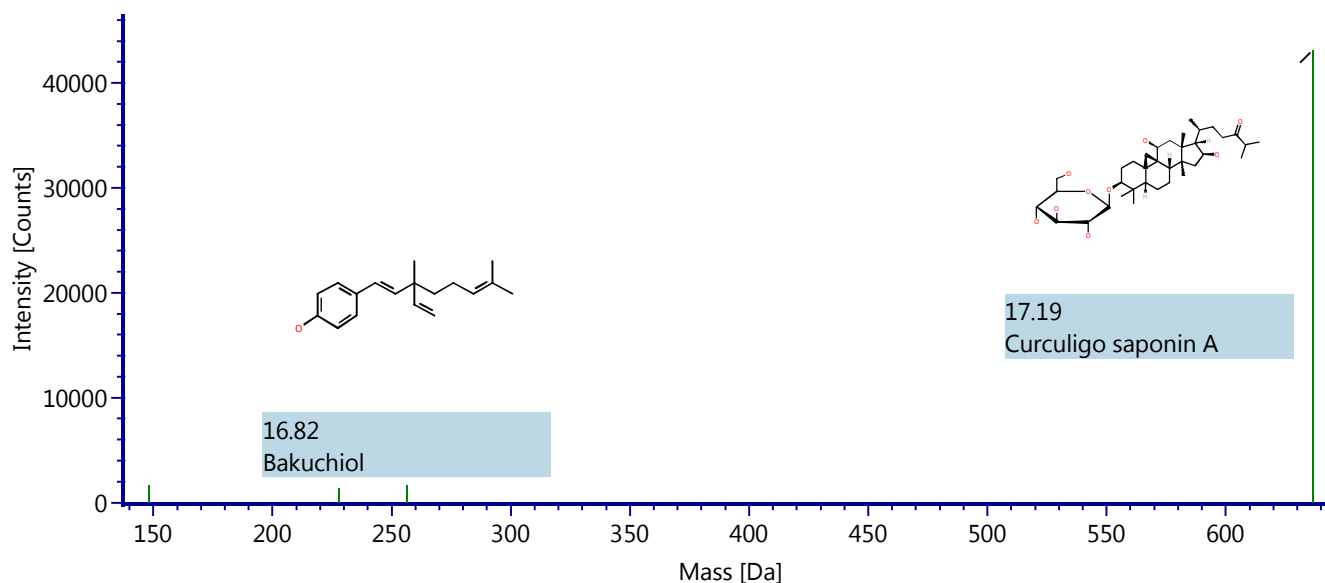

## Component Summary (Confirmed)

## Confirmed Component

| Component name                      | Formula                                        | Identification status | Observed RT (min) | Mass error (ppm) | Total Fragment s Found | Isotope Match Mz RMS PPM | Isotope Match Intensity RMS Percent | Response | Adducts |
|-------------------------------------|------------------------------------------------|-----------------------|-------------------|------------------|------------------------|--------------------------|-------------------------------------|----------|---------|
| 1-Methyl-3-(1-methyl-ethyl)-benzene | C <sub>11</sub> H <sub>16</sub>                | Identified            | 16.72             | -0.8             | 10                     | 0.98                     | 3.57                                | 1606     | +H      |
| Bakuchiol                           | C <sub>18</sub> H <sub>24</sub> O              | Identified            | 16.82             | -5.5             | 6                      | 5.06                     | 7.58                                | 1681     | +H      |
| Curculigo saponin A                 | C <sub>36</sub> H <sub>60</sub> O <sub>9</sub> | Identified            | 17.19             | -3.9             | 38                     | 4.31                     | 2.61                                | 43121    | +H      |
| Dehydrolindestrenolide              | C <sub>15</sub> H <sub>16</sub> O <sub>2</sub> | Identified            | 16.67             | -2.7             | 25                     | 2.52                     | 3.81                                | 1339     | +H      |

Item name: 230526\_305 R 93\_1\_Pos

Channel name: 1-Methyl-3-(1-methyl-ethyl)-benzene [+H] : (33.3 PPM) 149.1324

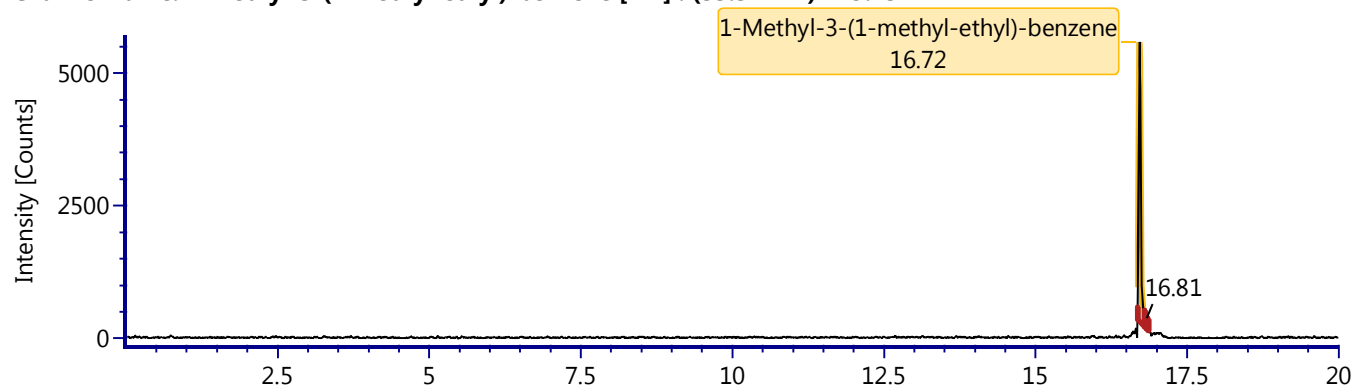

Item name: 230526\_305 R 93\_1\_Pos

Channel name: Bakuchiol [+H] : (33.3 PPM) 257.1886

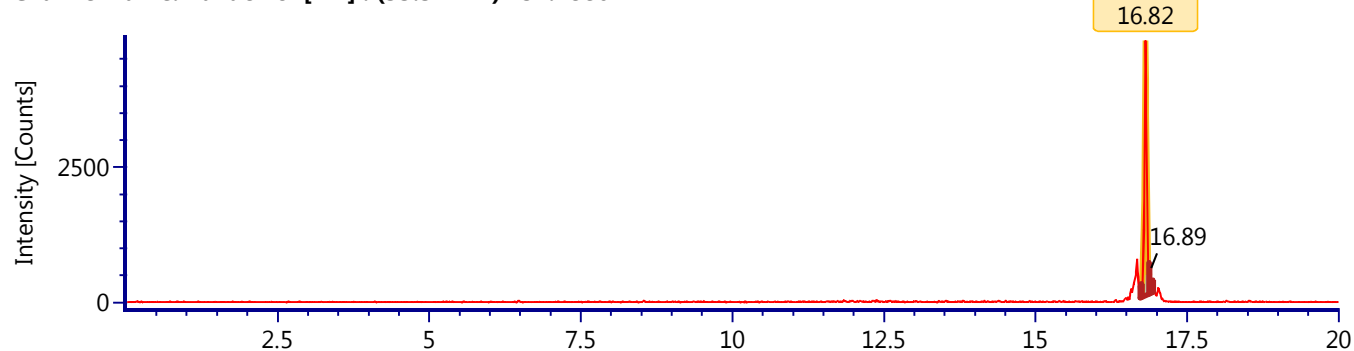

Item name: 230526\_305 R 93\_1\_Pos

Channel name: Curculigo saponin A [+H] : (33.3 PPM) 637.4285

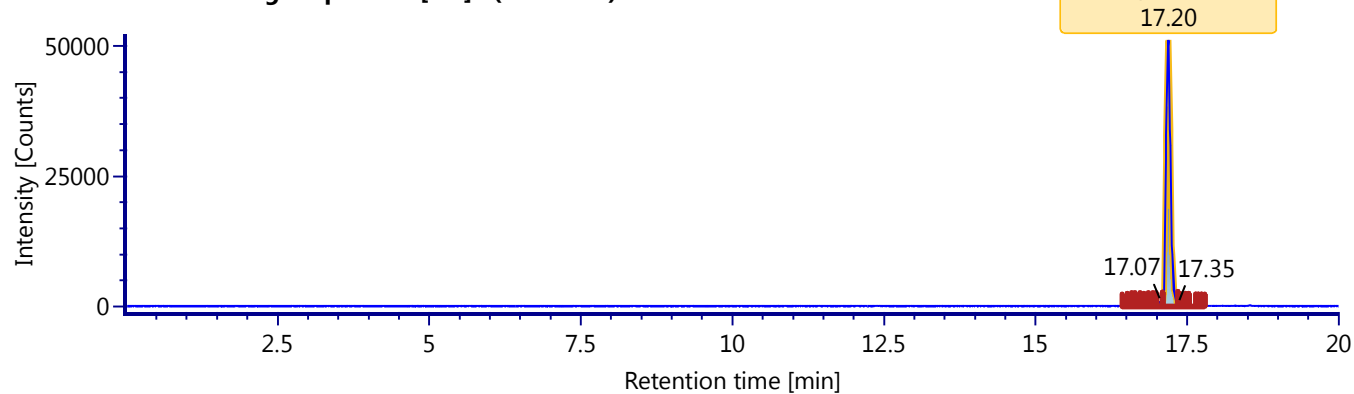

Item name: 230526\_305 R 93\_1\_Pos

Channel name: Dehydrolindestrenolide [+H] : (33.3 PPM) 229.1217

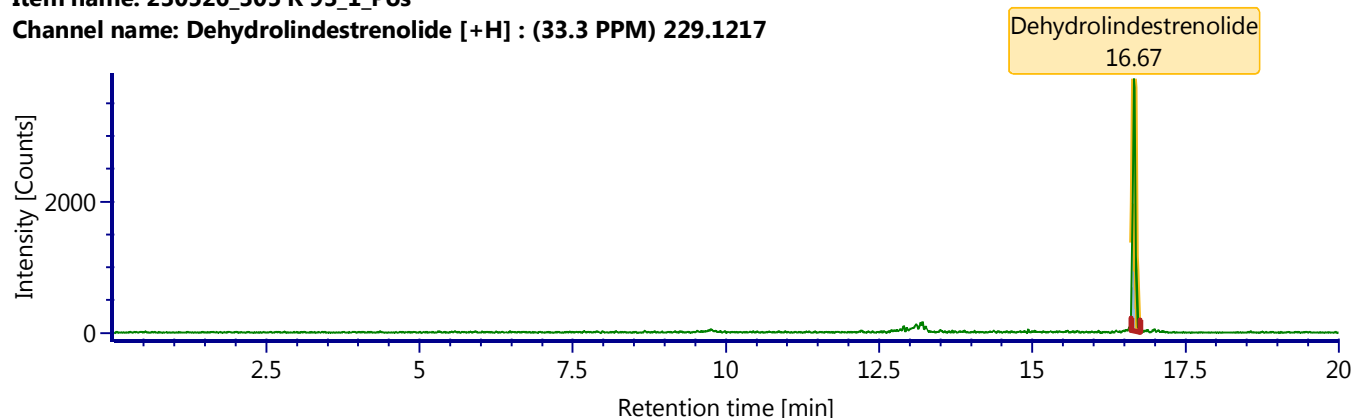

Item name: 230526\_305 R 93\_1\_Pos

Item description:

Component name: 1-Methyl-3-(1-methyl-ethyl)-benzene

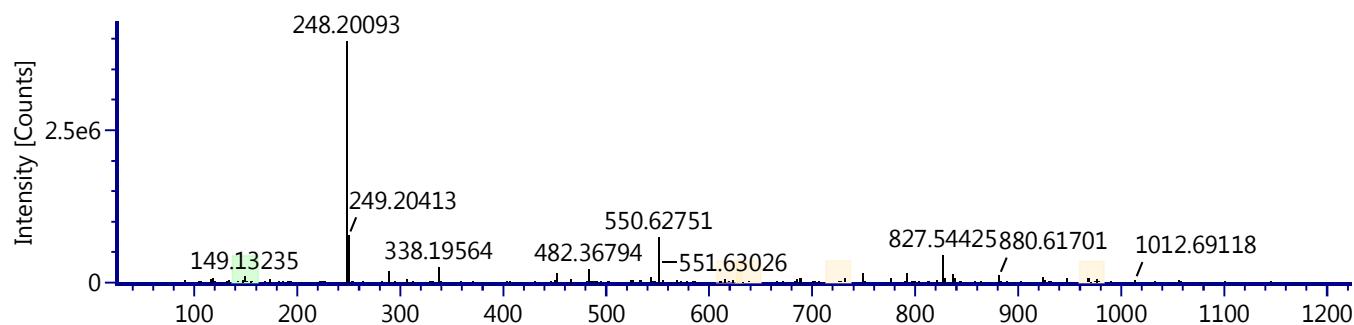

Item name: 230526\_305 R 93\_1\_Pos

Item description:

Component name: 1-Methyl-3-(1-methyl-ethyl)-benzene

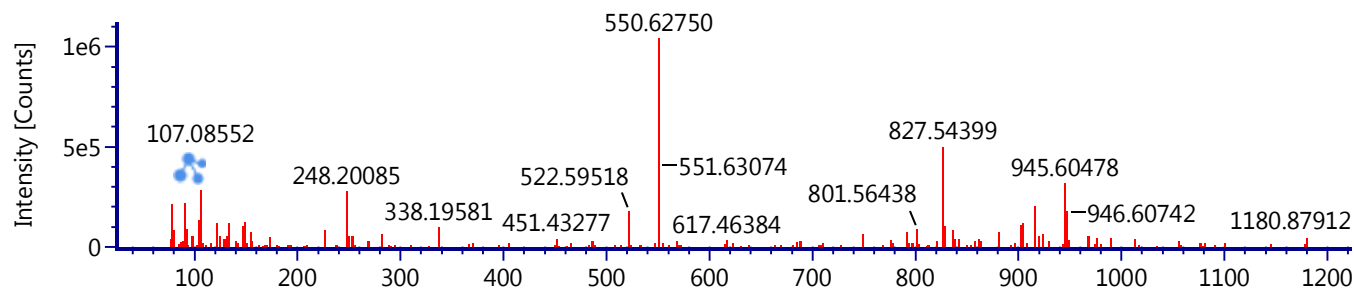

Item name: 230526\_305 R 93\_1\_Pos

Item description:

Component name: Bakuchiol

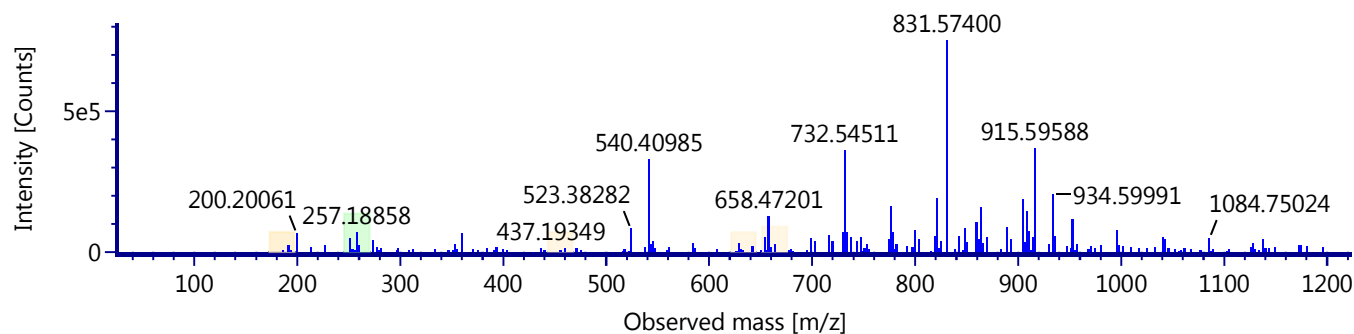



Item name: 230526\_305 R 93\_1\_Pos

Component name: Bakuchiol

Item description:

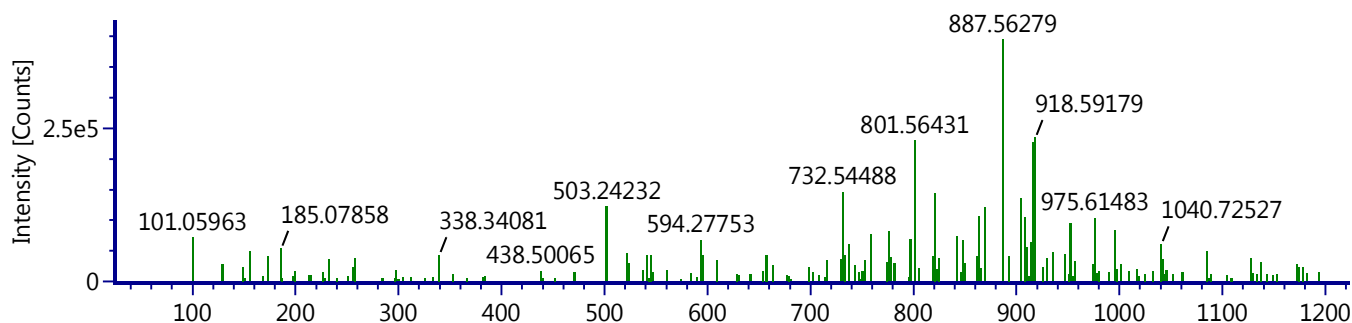

Item name: 230526\_305 R 93\_1\_Pos

Component name: Curculigo saponin A

Item description:

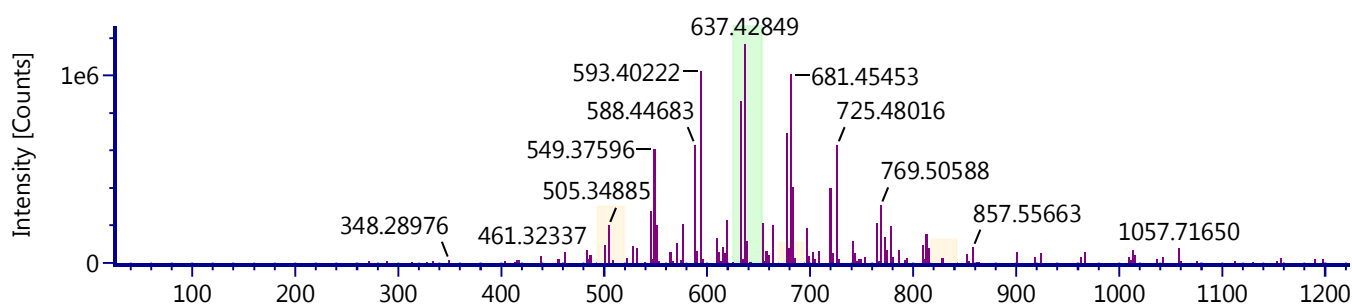

Item name: 230526\_305 R 93\_1\_Pos

Component name: Curculigo saponin A

Item description:

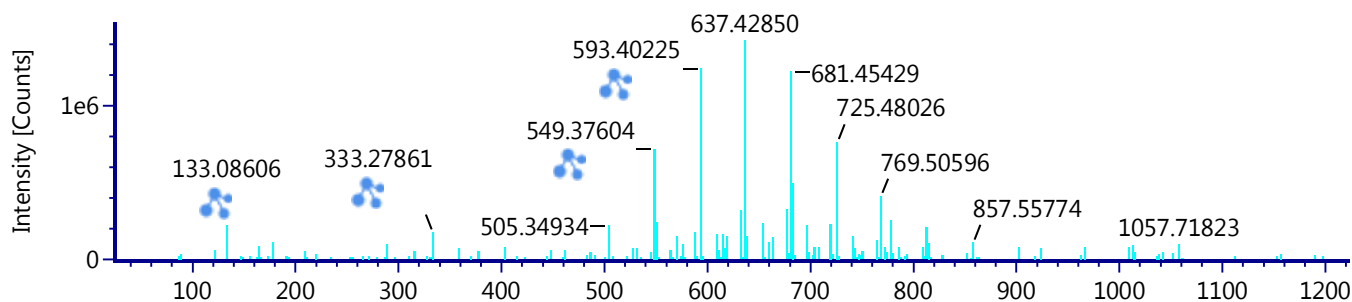

Item name: 230526\_305 R 93\_1\_Pos

Component name: Dehydrolindestrenolide

Item description:

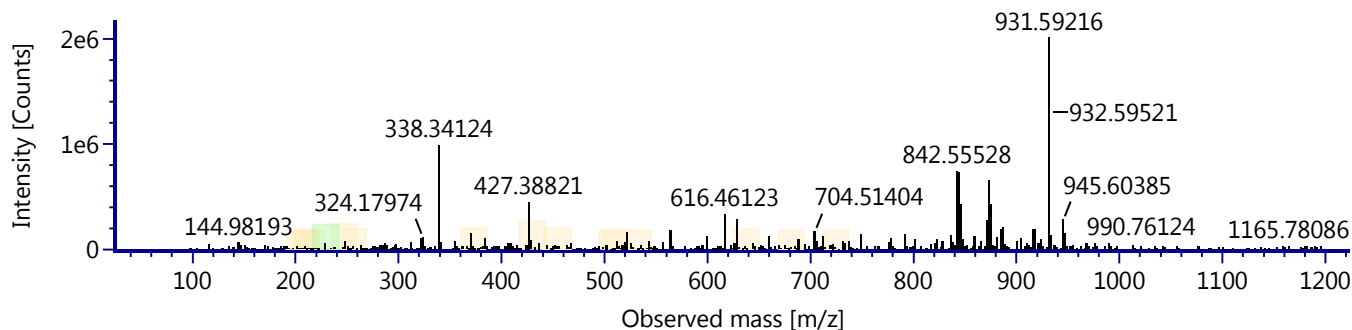

Item name: 230526\_305 R 93\_1\_Pos

Item description:

Component name: Dehydrolindestrenolide

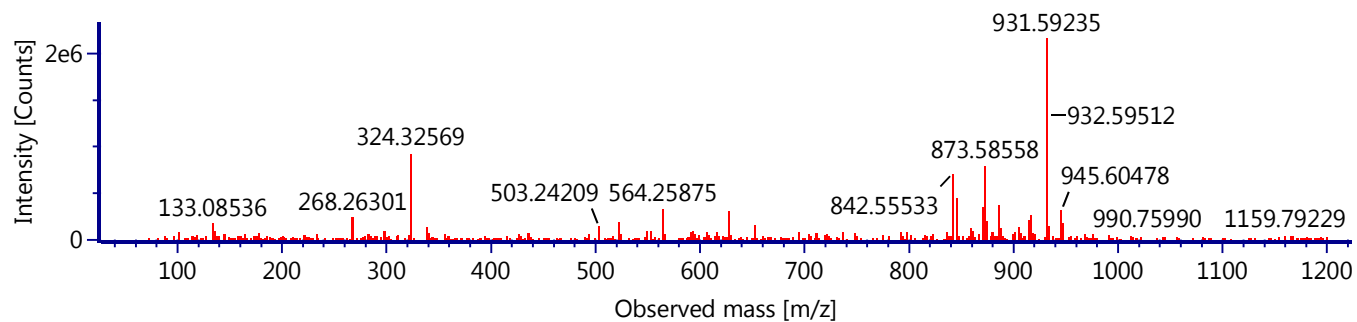

## The BPI Plot of Sampel

Item name: 230526\_305 R 93\_2\_Pos

Channel name: 1: TOF MS<sup>E</sup> BPI (50-1200) 6eV ESI+ : Integrated : Smoothed

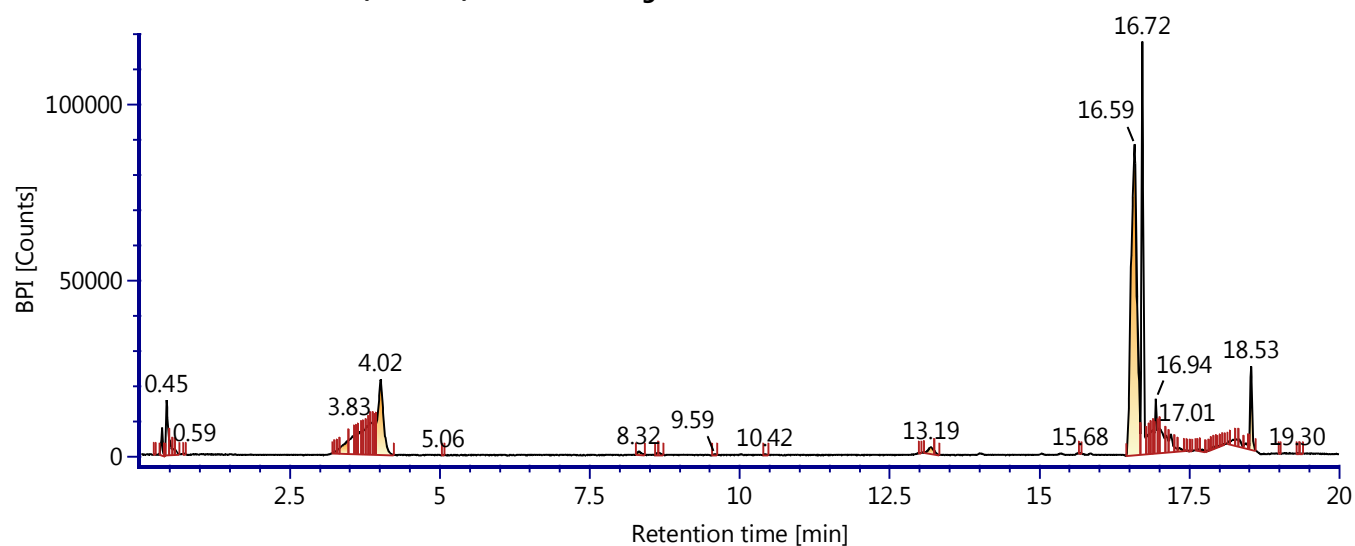

## Component Plot

Item name: 230526\_305 R 93\_2\_Pos

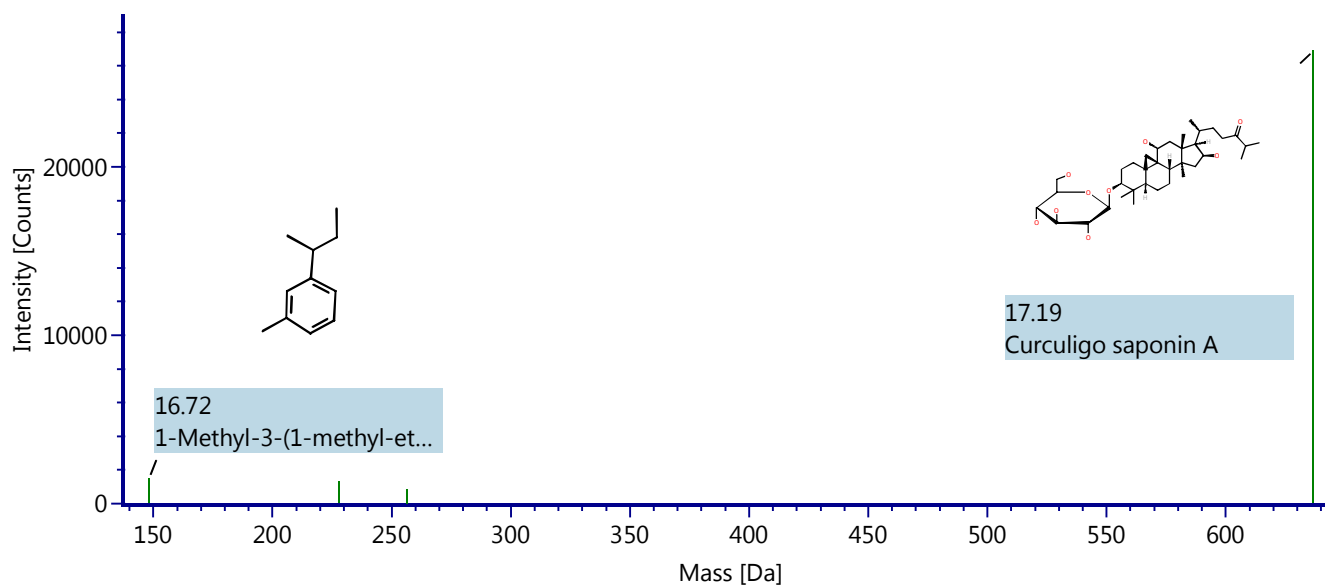

## Component Summary (Confirmed)

Confirmed Component

| Component name                      | Formula                                        | Identification status | Observed RT (min) | Mass error (ppm) | Total Fragments Found | Isotope Match Mz RMS PPM | Isotope Match Intensity RMS Percent | Response | Adducts |
|-------------------------------------|------------------------------------------------|-----------------------|-------------------|------------------|-----------------------|--------------------------|-------------------------------------|----------|---------|
| 1-Methyl-3-(1-methyl-ethyl)-benzene | C <sub>11</sub> H <sub>16</sub>                | Identified            | 16.72             | -1.4             | 12                    | 1.58                     | 2.41                                | 1493     | +H      |
| Bakuchiol                           | C <sub>18</sub> H <sub>24</sub> O              | Identified            | 16.82             | 0.7              | 2                     | 0.90                     | 2.93                                | 817      | +H      |
| Curculigo saponin A                 | C <sub>36</sub> H <sub>60</sub> O <sub>9</sub> | Identified            | 17.19             | -3.9             | 19                    | 4.47                     | 2.13                                | 26866    | +H      |
| Dehydrolindestrenolide              | C <sub>15</sub> H <sub>16</sub> O <sub>2</sub> | Identified            | 16.67             | -1.4             | 17                    | 3.32                     | 3.19                                | 1272     | +H      |

Item name: 230526\_305 R 93\_2\_Pos

Channel name: 1-Methyl-3-(1-methyl-ethyl)-benzene [+H] : (33.3 PPM) 149.1323

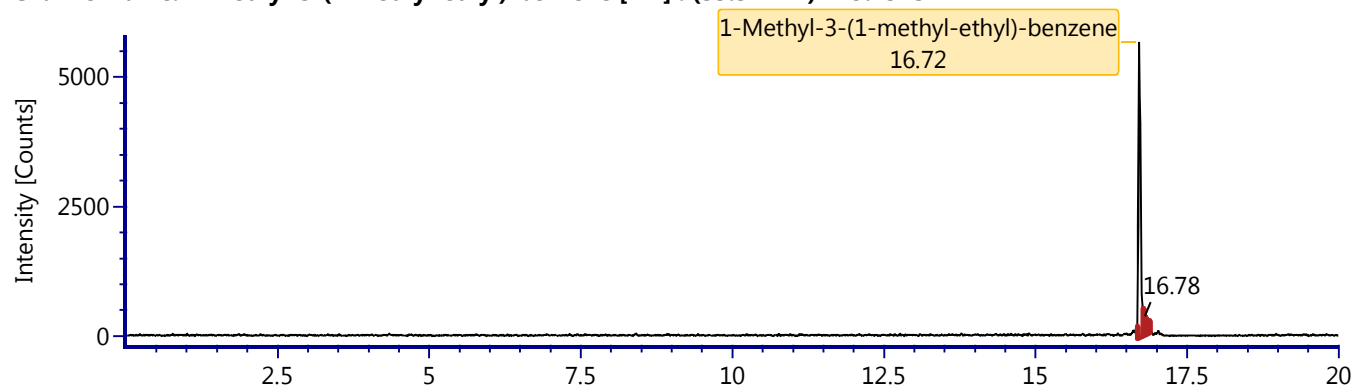

Item name: 230526\_305 R 93\_2\_Pos

Channel name: Bakuchiol [+H] : (33.3 PPM) 257.1902

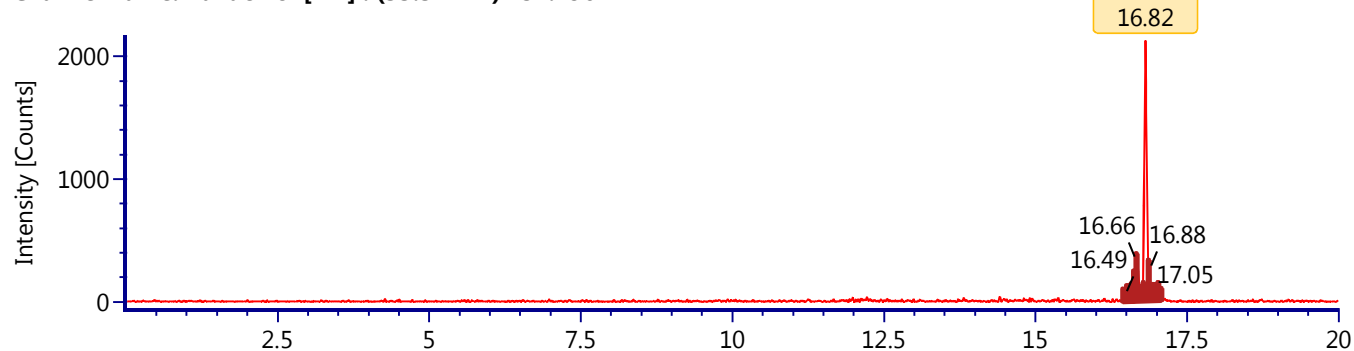

Item name: 230526\_305 R 93\_2\_Pos

Channel name: Curculigo saponin A [+H] : (33.3 PPM) 637.4285

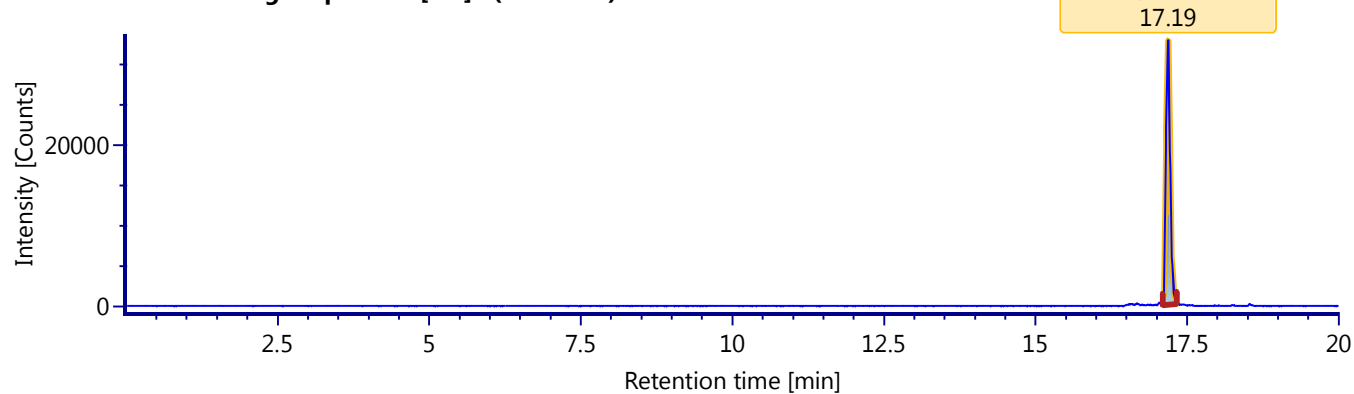

Item name: 230526\_305 R 93\_2\_Pos

Channel name: Dehydrolindestrenolide [+H] : (33.3 PPM) 229.1220

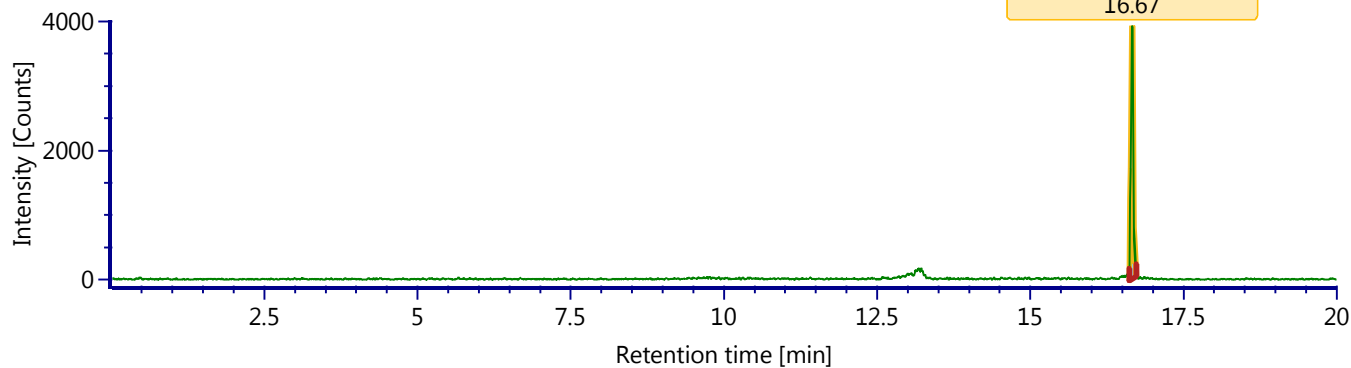

Item name: 230526\_305 R 93\_2\_Pos

Item description:

Component name: 1-Methyl-3-(1-methyl-ethyl)-benzene

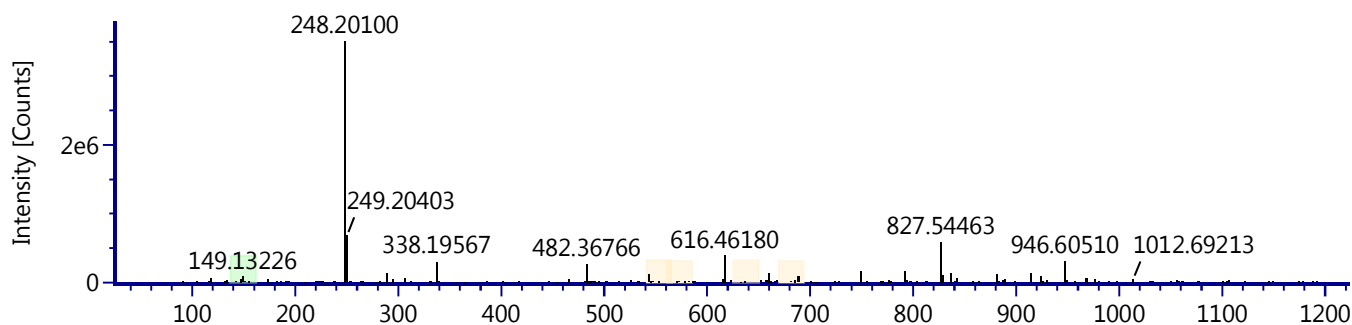

Item name: 230526\_305 R 93\_2\_Pos

Item description:

Component name: 1-Methyl-3-(1-methyl-ethyl)-benzene

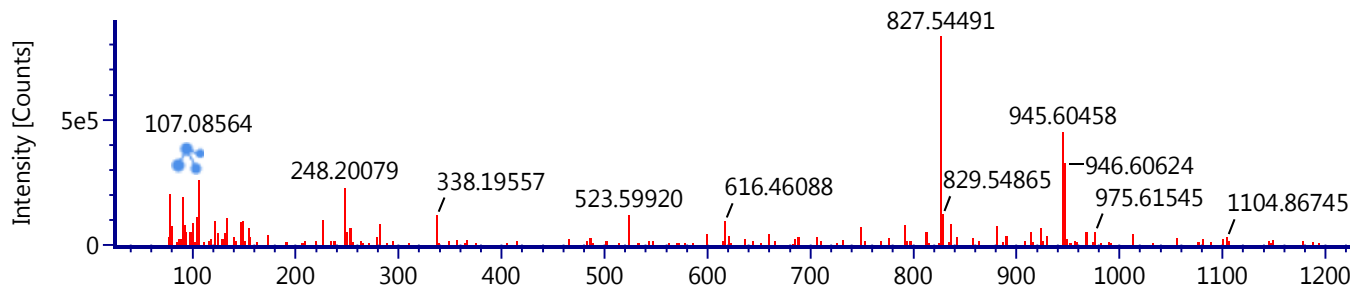

Item name: 230526\_305 R 93\_2\_Pos

Item description:

Component name: Bakuchiol

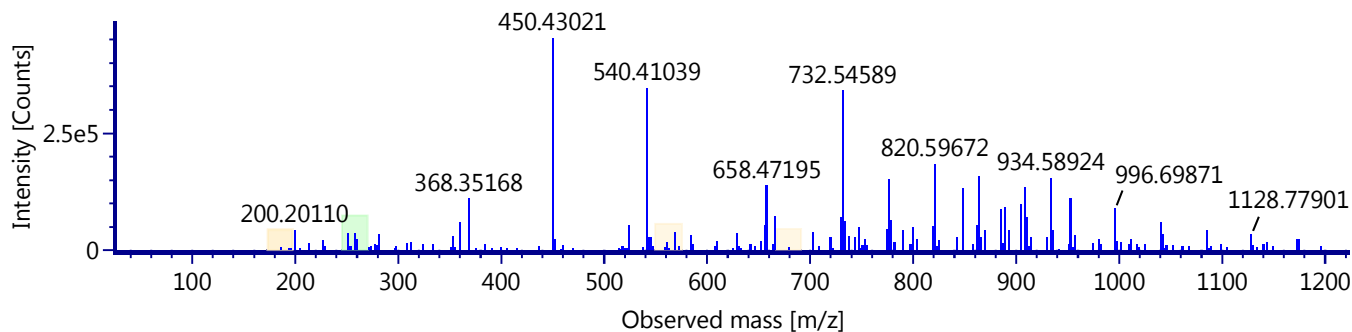

Item name: 230526\_305 R 93\_2\_Pos

Component name: Bakuchiol

Item description:

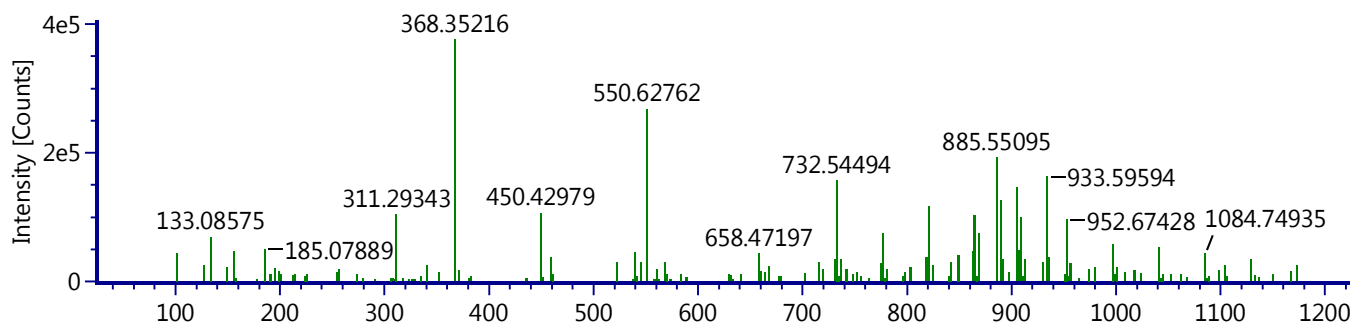

Item name: 230526\_305 R 93\_2\_Pos

Component name: Curculigo saponin A

Item description:

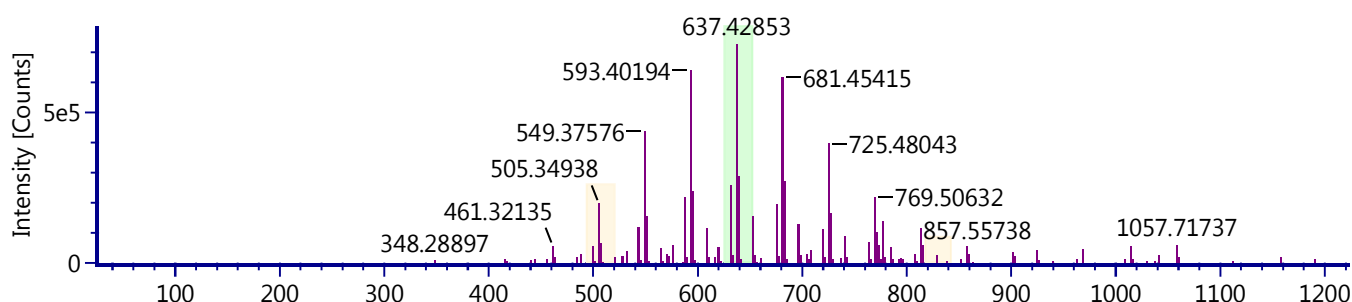

Item name: 230526\_305 R 93\_2\_Pos

Component name: Curculigo saponin A

Item description:

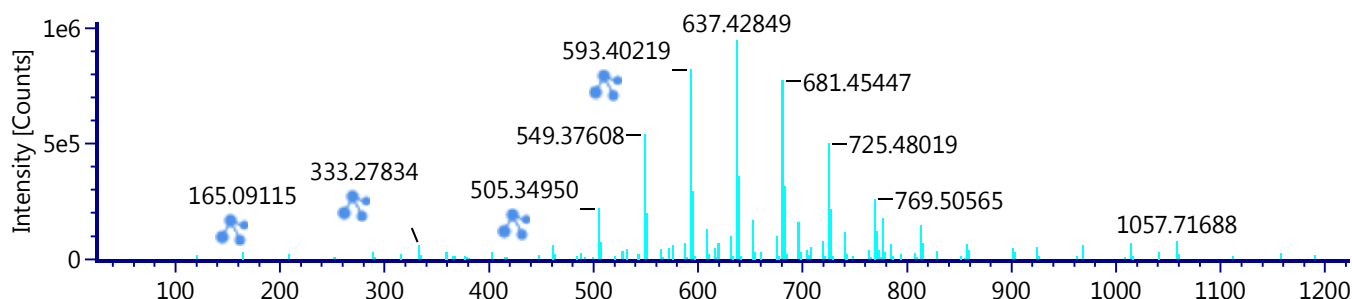

Item name: 230526\_305 R 93\_2\_Pos

Component name: Dehydrolindestrenolide

Item description:

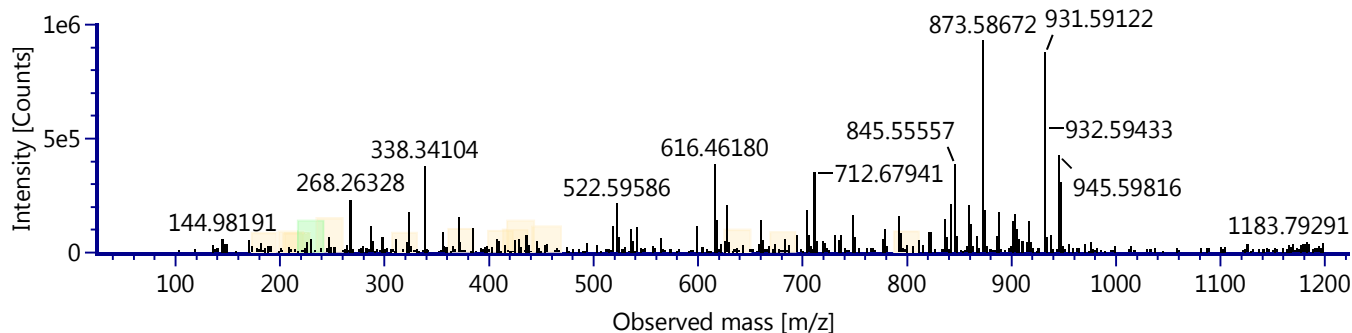

Item name: 230526\_305 R 93\_2\_Pos

Component name: Dehydrolindestrenolide

Item description:

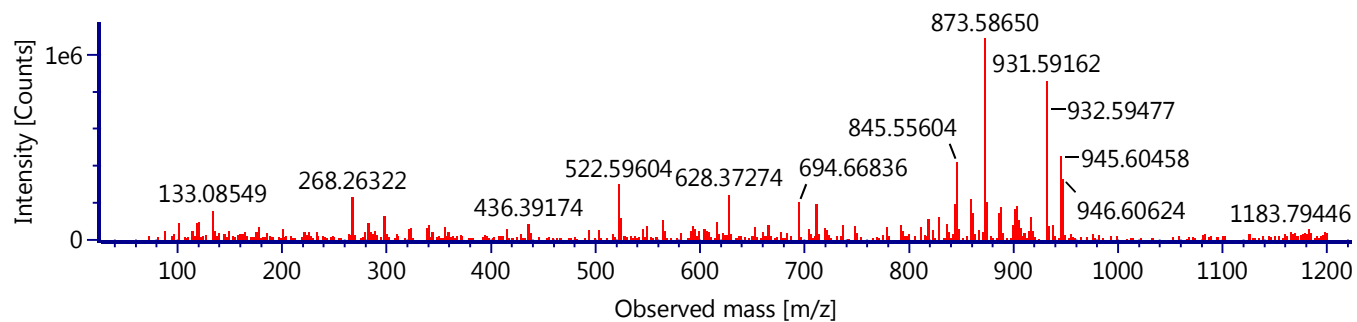

Supplement: s1 [file s1]
