# Supplementary material for: Revealing Edible Bird Nest as Novel Functional Foods in Combating Metabolic Syndrome: Comprehensive In Silico, In Vitro, and In Vivo Studies
Source: MDPI journal article supplement (doi:10.3390/nu15183886), 2023-09-06
Supplement: s1 [file s1]

iNOS 3E7G

| No.           | Substance   | Ligand Interaction                                                                                                                                                               |
|---------------|-------------|----------------------------------------------------------------------------------------------------------------------------------------------------------------------------------|
| Native Ligand |             |                                                                                                                                                                                  |
| 1             | 3E7G        | <p>Interactions</p> <ul style="list-style-type: none"><li>van der Waals</li><li>Conventional Hydrogen Bond</li><li>Carbon Hydrogen Bond</li><li>Alkyl</li><li>Pi-Alkyl</li></ul> |
| Control       |             |                                                                                                                                                                                  |
| 1             | S-ibuprofen | <p>Interactions</p> <ul style="list-style-type: none"><li>van der Waals</li><li>Conventional Hydrogen Bond</li><li>Carbon Hydrogen Bond</li><li>Alkyl</li><li>Pi-Alkyl</li></ul> |
| Ligan Uji     |             |                                                                                                                                                                                  |
| 1             | Bakuchiol   | <p>Interactions</p> <ul style="list-style-type: none"><li>van der Waals</li><li>Alkyl</li><li>Pi-Alkyl</li></ul>                                                                 |

|   |                                     |                                                                                                                                                                                                                                                                                             |
|---|-------------------------------------|---------------------------------------------------------------------------------------------------------------------------------------------------------------------------------------------------------------------------------------------------------------------------------------------|
| 2 | Curculigosaponin A                  | 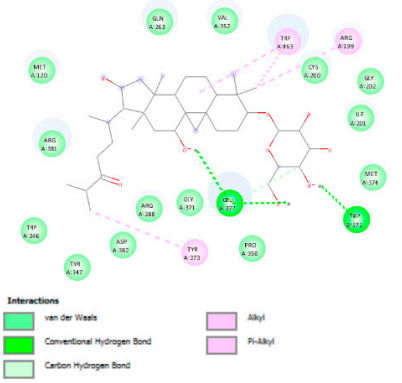 <p>Interactions</p> <ul style="list-style-type: none"> <li>van der Waals</li> <li>Conventional Hydrogen Bond</li> <li>Carbon Hydrogen Bond</li> <li>Pi-Sigma</li> <li>Alkyl</li> <li>Pi-Alkyl</li> </ul> |
| 3 | Dehydrolindestrenolide              |  <p>Interactions</p> <ul style="list-style-type: none"> <li>van der Waals</li> <li>Conventional Hydrogen Bond</li> <li>Pi-Sigma</li> <li>Alkyl</li> <li>Pi-Alkyl</li> </ul>                              |
| 4 | 1-Methyl-3-(1-methyl-ethyl)-benzene |  <p>Interactions</p> <ul style="list-style-type: none"> <li>van der Waals</li> <li>Pi-Sigma</li> <li>Pi-Pi T-stacked</li> <li>Pi-Alkyl</li> </ul>                                                       |

## ROS1 Kinase 3ZBF

| No. | Substance     | Ligand Interaction |
|-----|---------------|--------------------|
|     | Native Ligand |                    |



|   |                                     |                                                                                                                                                                                                                                                                  |
|---|-------------------------------------|------------------------------------------------------------------------------------------------------------------------------------------------------------------------------------------------------------------------------------------------------------------|
| 3 | Dehydrolindestrenolide              | 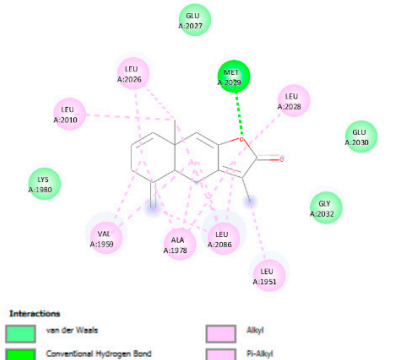 <p>Interactions</p> <ul style="list-style-type: none"> <li>van der Waals</li> <li>Conventional Hydrogen Bond</li> <li>Pi-Sigma</li> <li>Pi-Alkyl</li> <li>Pi-Alkyl</li> </ul> |
| 4 | 1-Methyl-3-(1-methyl-ethyl)-benzene |  <p>Interactions</p> <ul style="list-style-type: none"> <li>van der Waals</li> <li>Pi-Sigma</li> <li>Pi-Alkyl</li> <li>Pi-Alkyl</li> </ul>                                    |

# human pancreatic lipase 1LPB

| No.           | Substance | Ligand Interaction                                                                                                                                                                                                          |
|---------------|-----------|-----------------------------------------------------------------------------------------------------------------------------------------------------------------------------------------------------------------------------|
| Native Ligand |           |                                                                                                                                                                                                                             |
| 1             | 1LPB      | 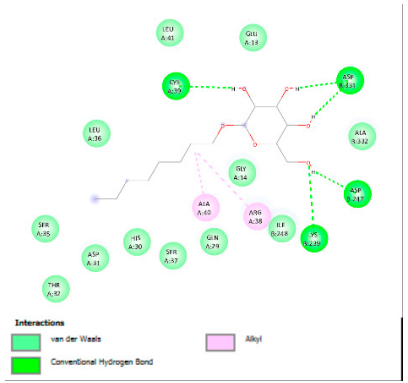 <p>Interactions</p> <ul style="list-style-type: none"> <li>van der Waals</li> <li>Conventional Hydrogen Bond</li> <li>Alkyl</li> </ul> |
| Control       |           |                                                                                                                                                                                                                             |

|           |                        |                                                                                                                                                                                                                                                                                |
|-----------|------------------------|--------------------------------------------------------------------------------------------------------------------------------------------------------------------------------------------------------------------------------------------------------------------------------|
| 1         | Orlistat               | 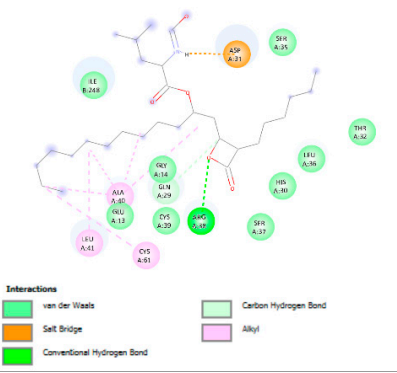 <p>Interactions</p> <ul style="list-style-type: none"> <li>van der Waals</li> <li>Salt Bridge</li> <li>Conventional Hydrogen Bond</li> <li>Carbon Hydrogen Bond</li> <li>Alkyl</li> </ul>   |
| Ligan Uji |                        |                                                                                                                                                                                                                                                                                |
| 1         | Bakuchiol              |  <p>Interactions</p> <ul style="list-style-type: none"> <li>van der Waals</li> <li>Salt Bridge</li> <li>Conventional Hydrogen Bond</li> <li>Carbon Hydrogen Bond</li> <li>Alkyl</li> </ul>  |
| 2         | Curculigosaponin A     |  <p>Interactions</p> <ul style="list-style-type: none"> <li>van der Waals</li> <li>Salt Bridge</li> <li>Conventional Hydrogen Bond</li> <li>Carbon Hydrogen Bond</li> <li>Alkyl</li> </ul> |
| 3         | Dehydrolindestrenolide |  <p>Interactions</p> <ul style="list-style-type: none"> <li>van der Waals</li> <li>Salt Bridge</li> <li>Conventional Hydrogen Bond</li> <li>Carbon Hydrogen Bond</li> <li>Alkyl</li> </ul> |
